# Supplementary material
Source: publisher figshare collection journal article supplement (https://acs.figshare.com/ndownloader/files/4535179)
Supplement: Supplementary file 1 [file 4535179]

## Supporting Information

### **Photoswitching of Dextro-/Levo- Rotation with Axially Chiral Binaphthyls linked to an Azobenzene**

Kazuto Takaishi,<sup>\*,†</sup> Masuki Kawamoto,<sup>†</sup> Kazunori Tsubaki,<sup>‡</sup> and Tatsuo Wada<sup>\*,†</sup>

<sup>†</sup>*Supramolecular Science Laboratory, RIKEN (The Institute of Physical and Chemical Research), Hirosawa 2-1, Wako, Saitama 351-0198, Japan and* <sup>‡</sup>*Graduate School of Life and Environmental Science, Kyoto Prefectural University, Shimogamo Hangi-cho, Sakyo, Kyoto 606-8522, Japan*

|                                                                                                            |           |
|------------------------------------------------------------------------------------------------------------|-----------|
| 1. UV-vis and CD spectra of (R)- <b>4-9</b> and (S)- <b>4</b> .                                            | Pages S2  |
| 2. Thermodynamic parameters of <i>cis-trans</i> isomerization process of (R)- <b>4</b> and (R)- <b>7</b> . | Pages S8  |
| 3. Synthesis of (R)- <b>4-8</b> and (S)- <b>4</b> .                                                        | Pages S10 |
| 4. Determination of configuration of (R)- <b>4</b> .                                                       | Pages S13 |
| 5. <sup>1</sup> H and <sup>13</sup> C NMR spectra.                                                         | Pages S14 |
| 6. References                                                                                              | Pages S28 |

1. UV-vis and CD spectra of (R)-4-9 and (S)-4.

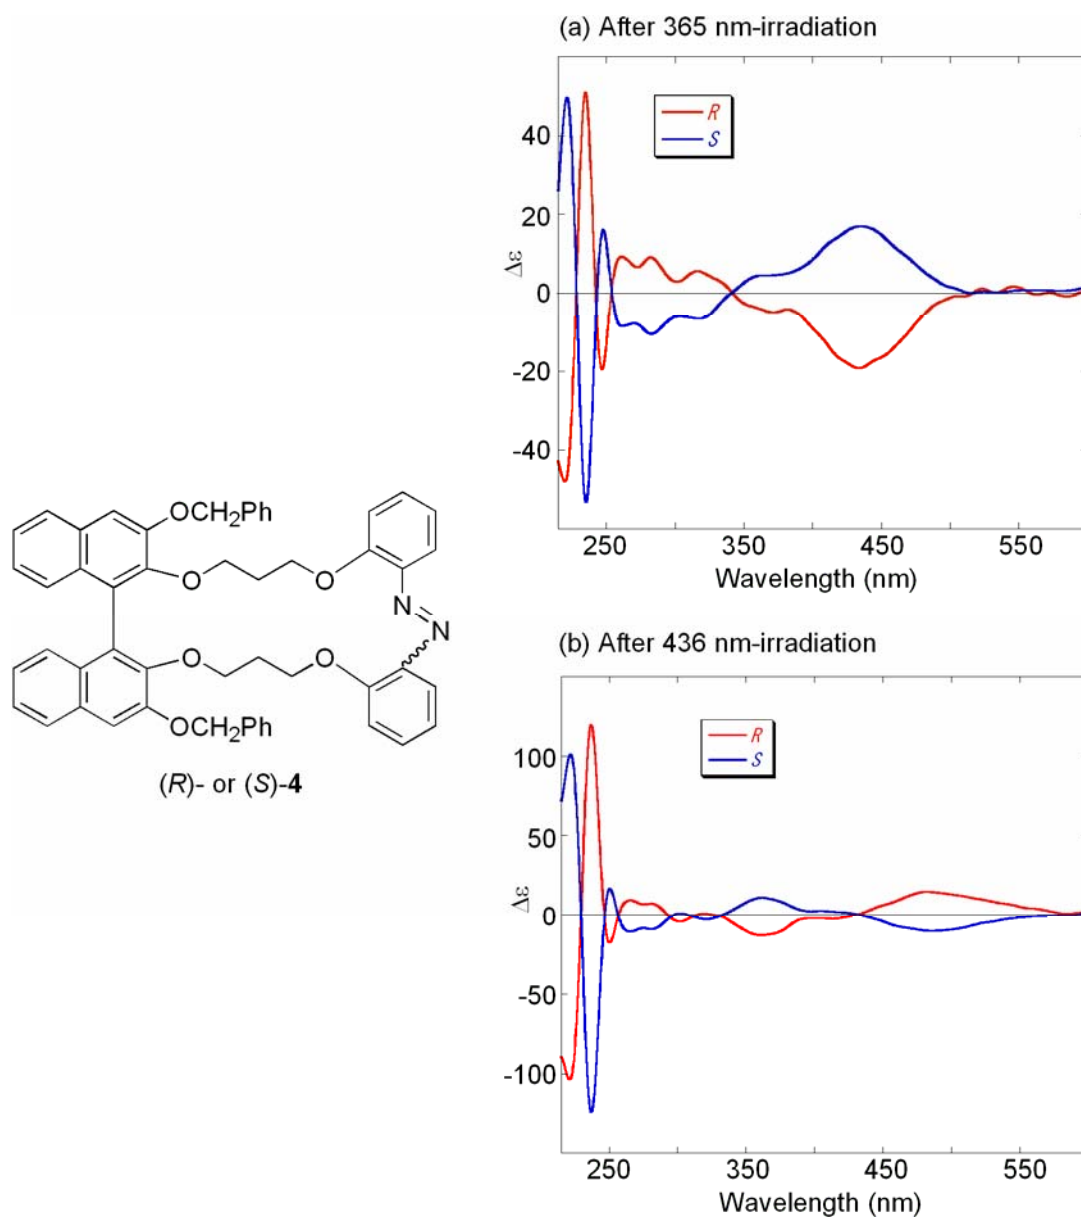

**Figure S-1.** CD spectra of (R)-4 (red line) and (S)-4 (blue line) after (a) 365 nm-irradiation and (b) 436 nm-irradiation. Conditions: 1,4-Dioxane,  $1.0 \times 10^{-5}$  M, 20 °C, light-path length = 10 mm, irradiation wavelength: 365 nm (10 mW/cm<sup>2</sup>, 100 s), 436 nm (10 mW/cm<sup>2</sup>, 100 s).

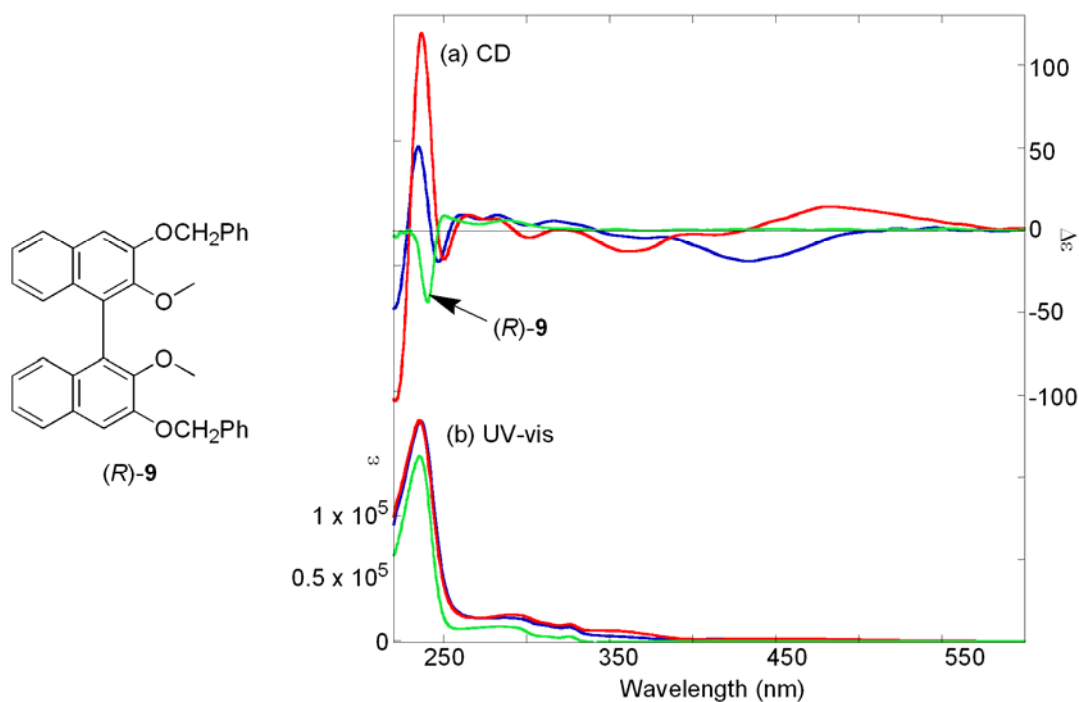

**Figure S-2.** CD and UV-vis spectra of (R)-4 and (R)-9<sup>s1</sup>. ((R)-4 after 365 nm-irradiation (blue line), (R)-4 after 436 nm-irradiation (red line), (R)-9 (green line)). Conditions: 1,4-Dioxane,  $1.0 \times 10^{-5}$  M, 20 °C, light-path length = 10 mm, irradiation wavelength: 365 nm (10 mW/cm<sup>2</sup>, 100 s), 436 nm (10 mW/cm<sup>2</sup>, 100 s).

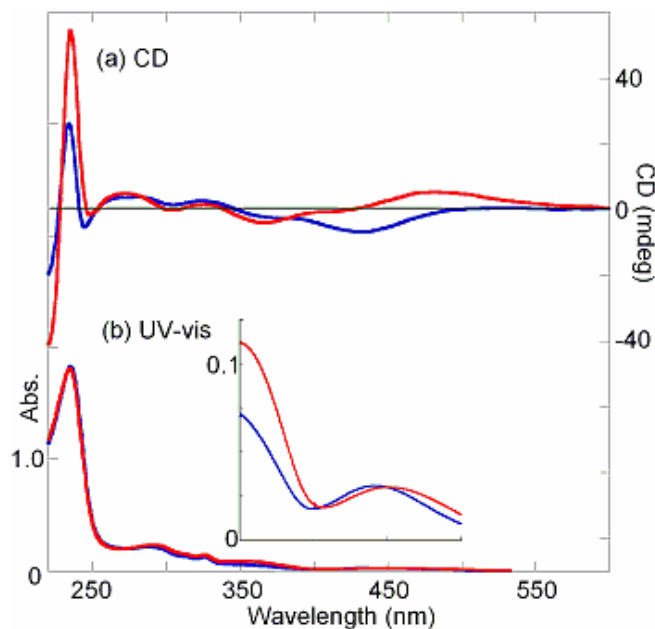

**Figure S-3.** (a) CD spectra of (R)-4, (b) Absorption spectra of (R)-4; after 365 nm-irradiation (blue line), after 436 nm-irradiation (red line). Conditions: Methanol, saturated concentration, 20 °C, light-path length = 10 mm, irradiation wavelength: 365 nm (10 mW/cm<sup>2</sup>, 100 s), 436 nm (10 mW/cm<sup>2</sup>, 100 s).

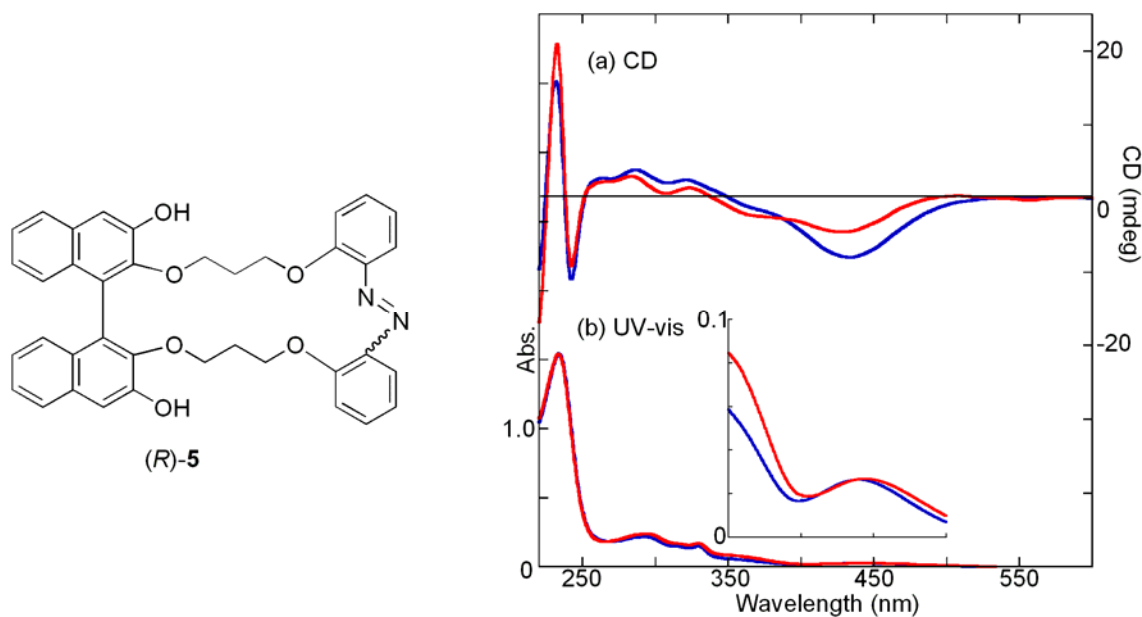

**Figure S-4.** (a) CD spectra of (R)-5, (b) Absorption spectra of (R)-5; after 365 nm-irradiation (blue line), after 436 nm-irradiation (red line). Conditions: Methanol, 20 °C, light-path length = 10 mm, irradiation wavelength: 365 nm (10 mW/cm<sup>2</sup>, 100 s), 436 nm (10 mW/cm<sup>2</sup>, 100 s).

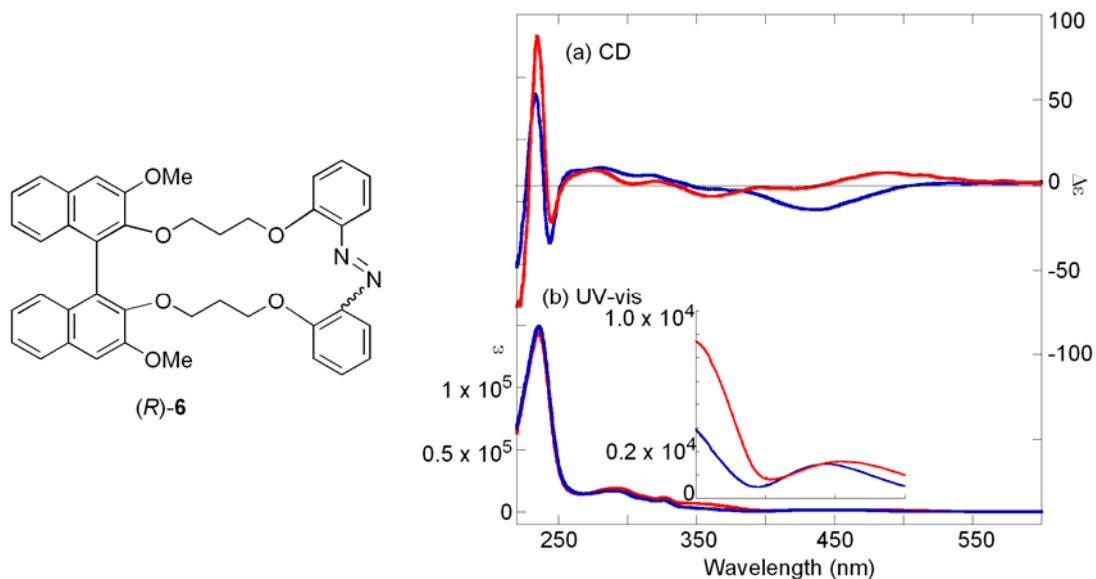

**Figure S-5.** (a) CD spectra of (R)-6, (b) Absorption spectra of (R)-6; after 365 nm-irradiation (blue line), after 436 nm-irradiation (red line). Conditions: 1,4-Dioxane, 1.0 x 10<sup>-5</sup> M, 20 °C, light-path length = 10 mm, irradiation wavelength: 365 nm (10 mW/cm<sup>2</sup>, 100 s), 436 nm (10 mW/cm<sup>2</sup>, 100 s).

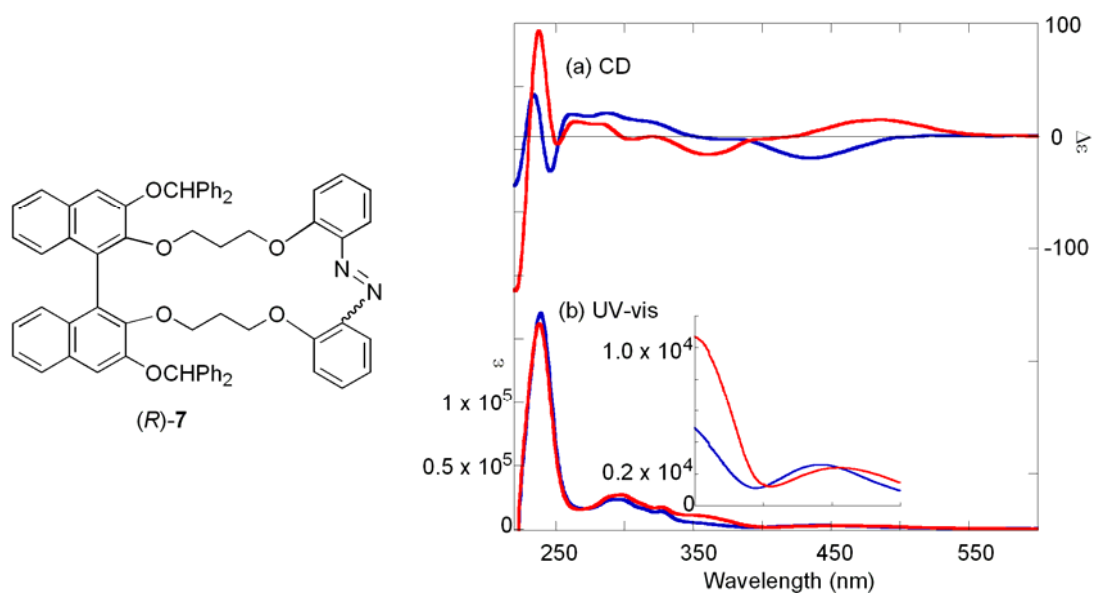

**Figure S-6.** (a) CD spectra of (R)-7, (b) Absorption spectra of (R)-7; after 365 nm-irradiation (blue line), after 436 nm-irradiation (red line). Conditions: 1,4-Dioxane,  $1.0 \times 10^{-5}$  M, 20 °C, light-path length = 10 mm, irradiation wavelength: 365 nm ( $10 \text{ mW/cm}^2$ , 100 s), 436 nm ( $10 \text{ mW/cm}^2$ , 100 s).

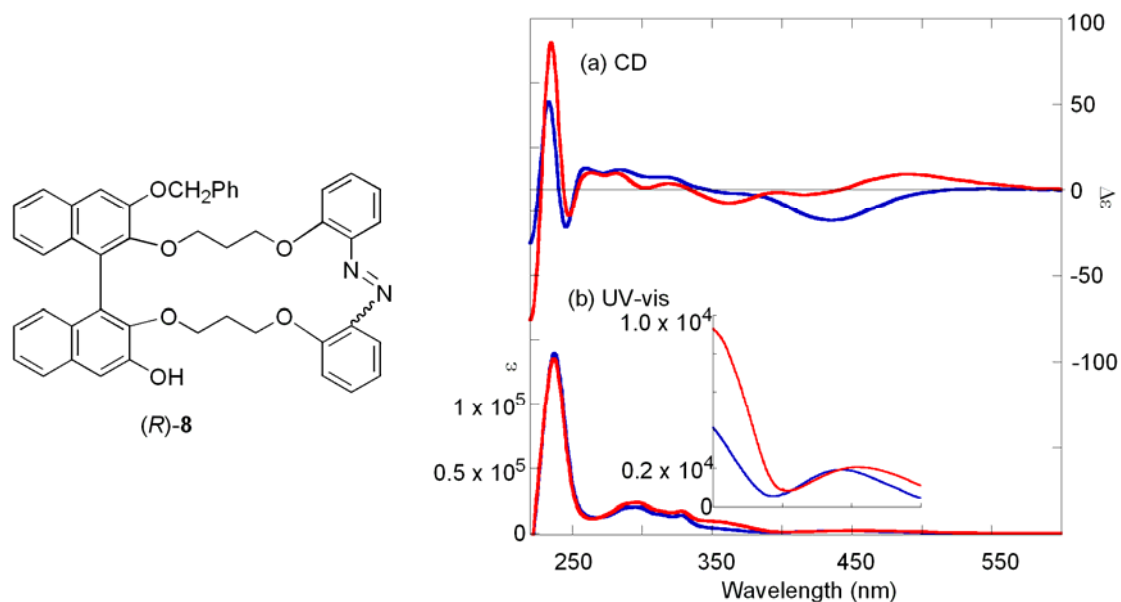

**Figure S-7.** (a) CD spectra of (R)-8, (b) Absorption spectra of (R)-8; after 365 nm-irradiation (blue line), after 436 nm-irradiation (red line). Conditions: 1,4-Dioxane,  $1.0 \times 10^{-5}$  M, 20 °C, light-path length = 10 mm, irradiation wavelength: 365 nm ( $10 \text{ mW/cm}^2$ , 100 s), 436 nm ( $10 \text{ mW/cm}^2$ , 100 s).

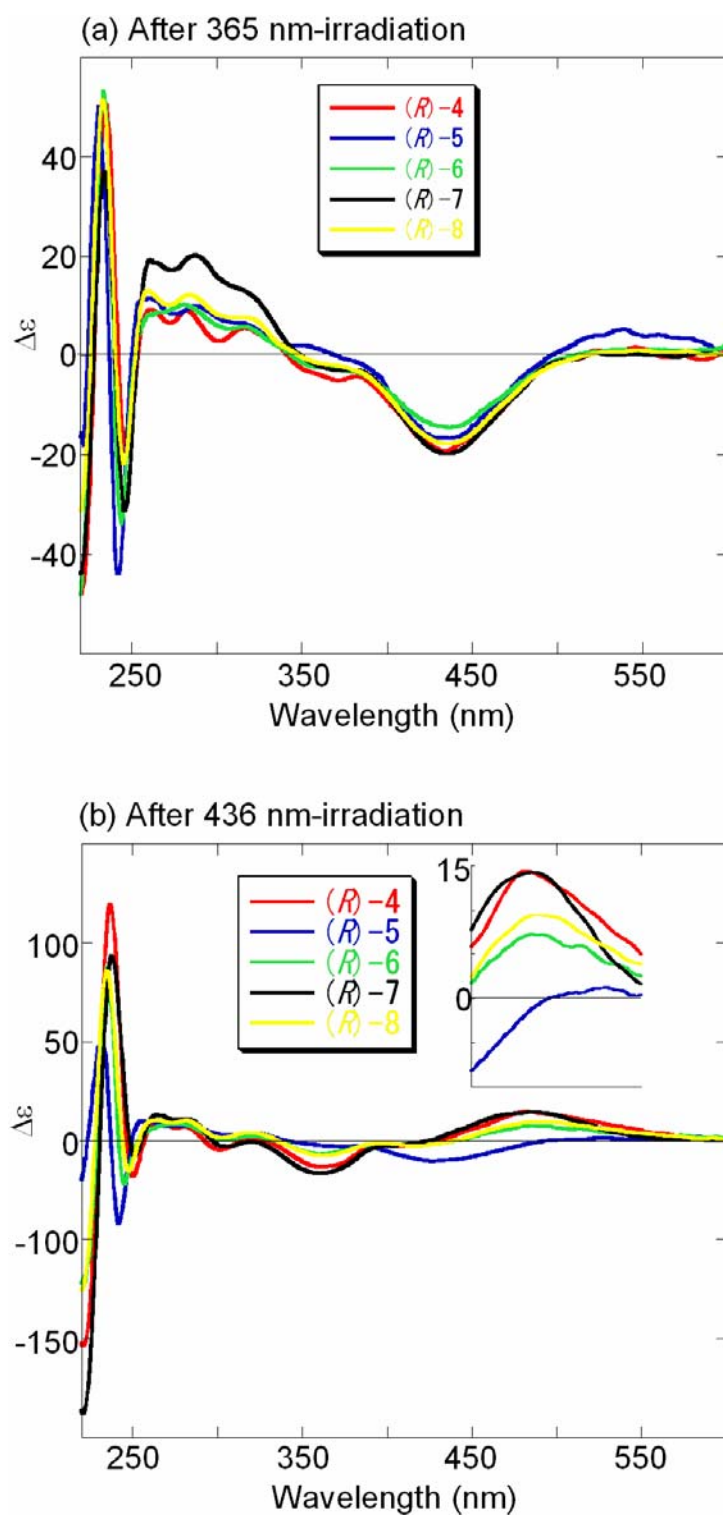

**Figure S-8.** CD spectra of (R)-4-8 after (a) 365 nm-irradiation and (b) 436 nm-irradiation. Conditions: 1,4-Dioxane,  $1.0 \times 10^{-5}$  M, 20 °C, light-path length = 10 mm, irradiation wavelength: 365 nm (10 mW/cm<sup>2</sup>, 100 s), 436 nm (10 mW/cm<sup>2</sup>, 100 s).

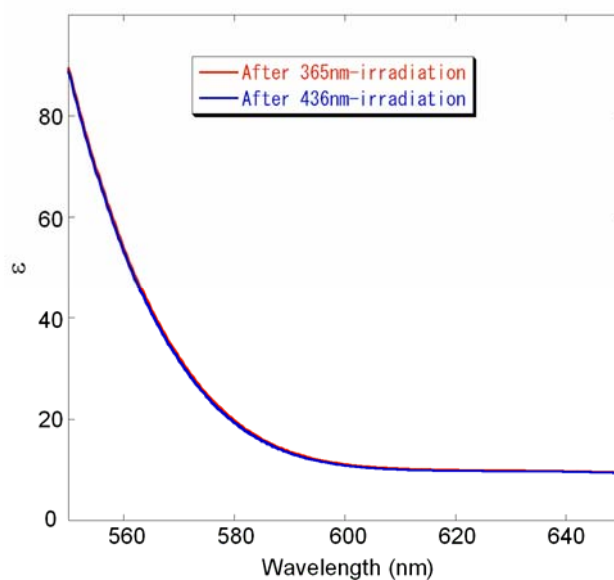

**Figure S-9.** Absorption spectra of concentrated (*R*)-**4** after photo-irradiation. Conditions: CHCl<sub>3</sub>, **0.0126 M (0.01 g/dl)**, light path length = 10 mm, 20 °C, Irradiation wavelength: 365 nm (10 mW/cm<sup>2</sup>, 500 s), 436 nm (10 mW/cm<sup>2</sup>, 500 s).

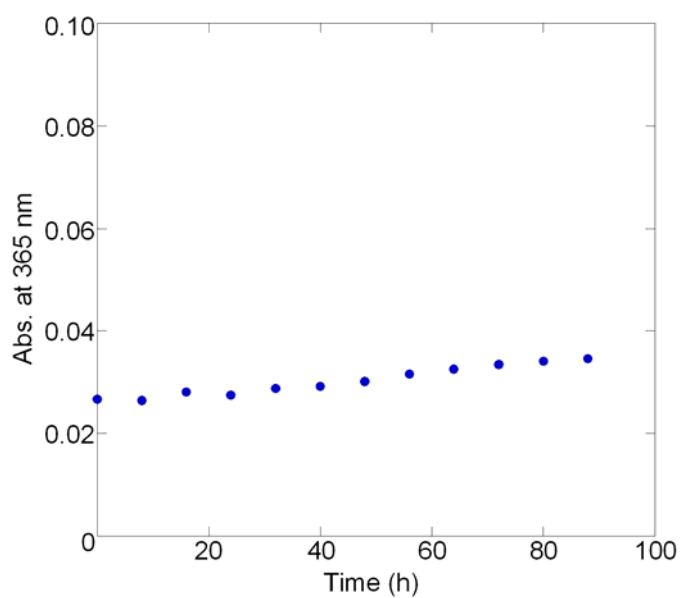

**Figure S-10.** Time-dependent change in absorbance of (*R*)-**4** after 365 nm-irradiation. Conditions: 1,4-Dioxane, light path length = 10 mm, 20 °C in the dark, Monitoring wavelength: 365 nm, Irradiation wavelength: 365 nm (10 mW/cm<sup>2</sup>, 100 s).

## 2. Thermodynamic parameters of *cis-trans* isomerization process of (R)-4 and (R)-7.

For the thermal *cis-trans* isomerization,

$$\ln \frac{[cis]_t}{[cis]_0} = -kt \quad (1)$$

Where  $[cis]_t$  and  $[cis]_0$  are the concentrations of the *cis*-azobenzene at time  $t$  and time zero, respectively, and  $k$  is the rate constant for the thermal *cis-trans* isomerization. The first-order rate constant was determined by fitting the experimental data to the equation,

$$\ln \frac{A_\infty - A_t}{A_\infty - A_0} = -kt \quad (2)$$

where  $A_t$ ,  $A_0$  and  $A_\infty$  are the absorbance at 365 nm at time  $t$ , time zero and infinite time, respectively. The first order plots according to equation 2 for the *cis-trans* thermal isomerization of (R)-4 and (R)-7 at various temperatures are shown in Figure S-11.

Furthermore thermodynamic parameters such as enthalpy of activation ( $\Delta H^\ddagger$ ) and entropy of activation ( $\Delta S^\ddagger$ ) were determined according to the Eyring equation<sup>S2</sup>:

$$k = \frac{k_B T}{h} \exp\left(\frac{\Delta S^\ddagger}{R}\right) \exp\left(-\frac{\Delta H^\ddagger}{RT}\right) \quad (3)$$

where  $R$ ,  $k_B$ , and  $h$  are gas constant, Boltzmann constant, and Planck's constant, respectively. Substituting into equation 3,

$$\ln\left(\frac{kh}{k_B T}\right) = -\frac{\Delta H^\ddagger}{RT} + \frac{\Delta S^\ddagger}{R} \quad (4).$$

Figure S-12 shows Eyring plots for *cis* to *trans* thermal isomerization of (R)-4 and (R)-7. The values of  $\Delta H^\ddagger$  and  $\Delta S^\ddagger$  were obtained from intersect and aslope, respectively, of the linear plot of  $\ln(hk/k_B T)$  versus  $1/T$  extrapolated to  $T \rightarrow \infty$ .



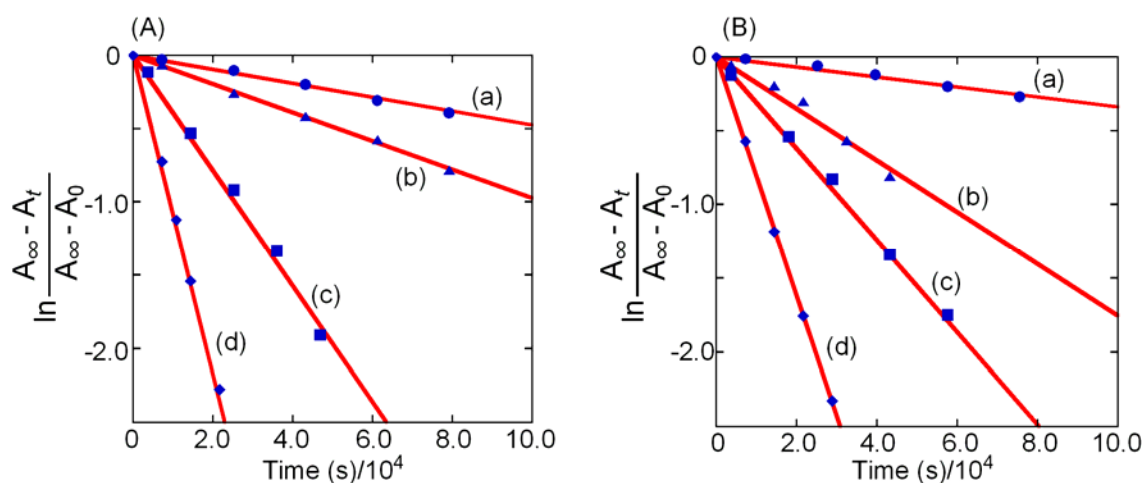

**Figure S-11.** First-order plots for *cis* to *trans* thermal isomerization of (R)-4 (A) and (R)-7 (B). (a) 35 °C, (b) 45 °C, (c) 55 °C, (d) 65 °C. Conditions: 1,4-Dioxane, 1.0 x 10<sup>-5</sup> M.

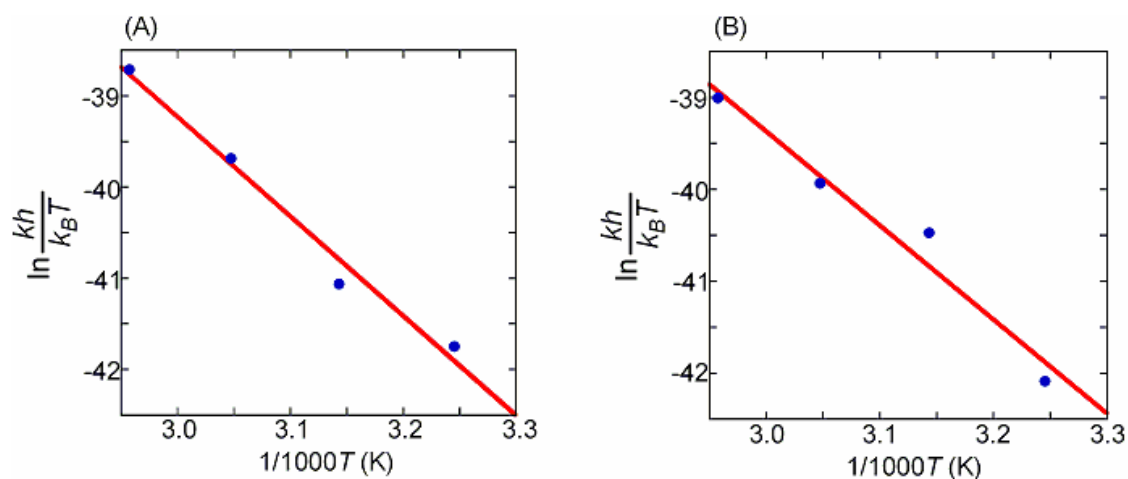

**Figure S-12.** Eyring plots for *cis* to *trans* thermal isomerization of (R)-4 and (R)-7. Conditions: 1,4-Dioxane, 1.0 x 10<sup>-5</sup> M.

**Table S-1.** Rate coefficients  $k$  (s<sup>-1</sup>) of *cis* to *trans* isomerization and the values of  $\Delta H^\ddagger$  and  $\Delta S^\ddagger$  of (R)-4 and (R)-7.

|       | $k$ at 35 °C         | $k$ at 45 °C         | $k$ at 55 °C         | $k$ at 65 °C         | $\Delta H^\ddagger$ | $\Delta S^\ddagger$ |
|-------|----------------------|----------------------|----------------------|----------------------|---------------------|---------------------|
| (R)-4 | $4.7 \times 10^{-6}$ | $9.8 \times 10^{-6}$ | $4.0 \times 10^{-5}$ | $1.1 \times 10^{-4}$ | 22 kcal/mol         | -13 cal/mol·K       |
| (R)-7 | $3.4 \times 10^{-6}$ | $1.8 \times 10^{-5}$ | $3.1 \times 10^{-5}$ | $8.1 \times 10^{-5}$ | 20 kcal/mol         | -17 cal/mol·K       |

Conditions: 1,4-Dioxane, 1.0 x 10<sup>-5</sup> M.

### 3. Synthesis

Synthetic route of binaphthyl with azobenzene **4-8** is shown below. Binaphthyl **2**<sup>S3</sup> and dibromide **3**<sup>S4</sup> was prepared by following the reported procedure.

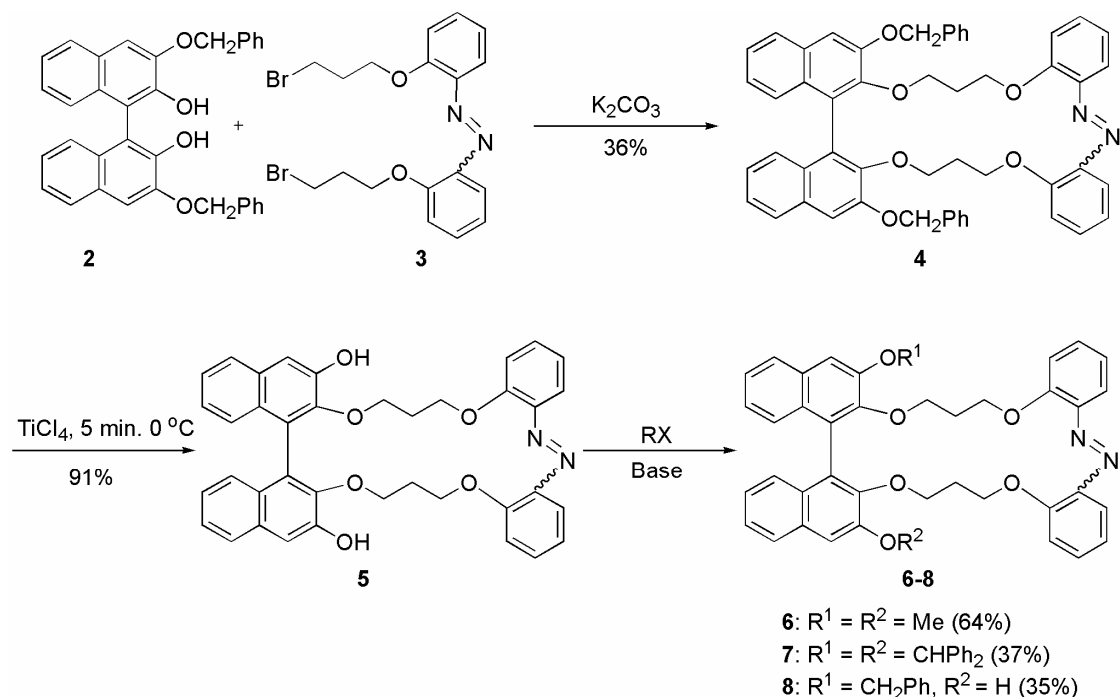

#### 3,3'-Dibenzyloxybinaphthyl with azobenzene (*S*)-**4**

A suspension of (*S*)-**2** (100 mg, 0.201 mmol), NaH (10.6 mg, 0.442 mmol, 2.2 eq.) and **3** (91 mg, 0.201 mmol, 1.0 eq.) in DMF (15 ml) was stirred for 12 hours at room temperature. The reaction mixture was poured into the mixed solvent of chloroform and water. The organic layer was separated and washed successively with 0.1 N hydrochloric acid solution, water (twice) and brine. After dried over sodium sulfate, the solvent was evaporated in vacuo to give a residue. The residue was purified by column chromatography ( $\text{SiO}_2$ ; *n*-hexane/chloroform = 1/2) and GPC to afford (*S*)-**4** (57 mg, 0.0719 mmol, 36%). Red amorphous; IR (KBr) 2959, 1439, 1281, 1250, 1017, 748  $\text{cm}^{-1}$ ;  $^1\text{H}$  NMR (400 MHz,  $\text{CDCl}_3$ )  $\delta$  1.2-2.1 (m, 4H), 3.2-4.3 (m, 8H), 4.88, 5.19 (ABq,  $\nu_{AB} = 61.7 \text{ Hz}$ ,  $J_{AB} = 11.2 \text{ Hz}$ ; s, 4H), 6.4-7.5 (m, 26H), 7.73, 7.78 (two d,  $J = 8.4 \text{ Hz}$ , 8.4 Hz, 2H);  $^{13}\text{C}$  NMR (75 MHz,  $\text{CDCl}_3$ )  $\delta$  29.5, 29.7, 64.8, 65.1, 68.9, 70.1, 70.5, 70.6, 108.4, 108.4, 113.1, 113.9, 119.4, 120.2, 124.0, 124.2, 125.0, 125.6, 125.7, 125.2, 126.3, 127.8, 127.9, 128.2, 128.5, 128.8, 128.8, 130.5, 130.6, 130.8, 136.4, 136.5, 142.6, 143.7, 145.9, 146.4, 151.1, 151.3, 152.8 (Some peaks overlapped); HRMS ( $\text{ESI}^+$ ) Calcd for  $\text{C}_{52}\text{H}_{44}\text{N}_2\text{O}_6\text{Na}$  ( $\text{M}+\text{Na}^+$ ): 815.3097. Found: 815.3076; LR MS ( $\text{FAB}^+$ ) 792.4 ( $\text{M}^+$ ).

### 3,3'-Dimethoxybinaphthyl with azobenzene (R)-6

A suspension of (R)-5 (30 mg, 0.0490 mmol), K<sub>2</sub>CO<sub>3</sub> (34 mg, 0.245 mmol, 5 eq.) and MeI (30 µl, 0.490 mmol, 10 eq.) in DMF (1.5 ml) was stirred for 12 hours at room temperature. The reaction mixture was poured into the mixed solvent of chloroform and water. The organic layer was separated and washed successively with 0.1 N hydrochloric acid solution, water (twice) and brine. After dried over sodium sulfate, the solvent was evaporated in vacuo to give a residue. The residue was purified by column chromatography (SiO<sub>2</sub>; *n*-hexane/chloroform/ethyl acetate = 4/3/1, then 2/3/1) and GPC to afford (R)-6 (20 mg, 0.0312 mmol, 64%). Red amorphous; IR (KBr) 2959, 1281, 1250, 1022, 748 cm<sup>-1</sup>; <sup>1</sup>H NMR (300 MHz, CDCl<sub>3</sub>) δ 1.2-2.1 (m, 4H), 3.2-4.2 (m, 8H), 3.65, 3.83 (two s, 6H), 6.52, 6.61 (two d, *J* = 8.1 Hz, 8.1 Hz, 2H), 6.6-7.5 (m, 14H), 7.66, 7.71 (two d, *J* = 8.1 Hz, 8.1 Hz, 2H); <sup>13</sup>C NMR (100 MHz, CDCl<sub>3</sub>) δ 29.7, 29.9, 55.1, 55.3, 64.9, 65.5, 69.1, 70.4, 107.0, 107.2, 113.1, 114.6, 119.4, 120.5, 120.5, 121.1, 123.9, 124.1, 125.1, 125.2, 125.6, 125.9, 126.2, 126.3, 126.5, 126.7, 128.1, 128.6, 130.5, 130.8, 130.9, 131.1, 142.7, 144.2, 145.9, 146.2, 151.8, 152.1, 152.3, 152.9; HRMS (ESI<sup>+</sup>) Calcd for C<sub>40</sub>H<sub>36</sub>N<sub>2</sub>O<sub>6</sub>Na (M+Na)<sup>+</sup>: 663.2471. Found: 663.2464; LR MS (FAB<sup>+</sup>) 640.3 (M)<sup>+</sup>.

### 3,3'-Bis(diphenylmethoxy)binaphthyl with azobenzene (R)-7

A suspension of (R)-5 (64 mg, 0.104 mmol), K<sub>2</sub>CO<sub>3</sub> (72 mg, 0.522 mmol, 5 eq.) and α-bromodiphenylmethane (257 mg, 1.04 mmol, 10 eq.) in DMF (4.0 ml) was stirred for 14 hours at 50 °C. The reaction mixture was poured into the mixed solvent of chloroform and water. The organic layer was separated and washed successively with 0.1 N hydrochloric acid solution, water (twice) and brine. After dried over sodium sulfate, the solvent was evaporated in vacuo to give a residue. The residue was purified by GPC to afford (R)-7 (36 mg, 0.0381 mmol, 37%). Red amorphous; IR (KBr) 2960, 1283, 1248, 748 cm<sup>-1</sup>; <sup>1</sup>H NMR (400 MHz, CDCl<sub>3</sub>) δ 1.2-2.0 (m, 4H), 3.2-4.4 (m, 8H), 6.07, 6.43 (two s, 2H), 6.4-7.5 (m, 36H), 7.56, 7.61 (two d, *J* = 8.4 Hz, 8.0 Hz, 2H); <sup>13</sup>C NMR (100 MHz, CDCl<sub>3</sub>) δ 29.2, 29.7, 64.5, 65.5, 69.1, 70.8, 82.3, 82.9, 111.4, 111.7, 112.9, 114.3, 119.4, 120.3, 120.6, 122.2, 124.1, 124.3, 124.8, 125.6, 125.8, 126.1, 126.6, 126.7, 126.8, 127.0, 127.4, 127.6, 127.8, 127.9, 128.2, 128.6, 128.7, 128.7, 128.9, 130.5, 130.6, 140.8, 140.9, 140.9, 141.1, 142.9, 143.8, 146.4, 147.1, 150.1, 150.4, 152.9; HRMS (FAB<sup>+</sup>) Calcd for C<sub>64</sub>H<sub>53</sub>N<sub>2</sub>O<sub>6</sub> (M+H)<sup>+</sup>: 945.3907. Found: 945.3893; LR MS (FAB<sup>+</sup>) 944.4 (M)<sup>+</sup>.

### 3-Benzyloxy-3'-hydroxy-binaphthyl with azobenzene (R)-8

A suspension of (R)-5 (40 mg, 0.0653 mmol), K<sub>2</sub>CO<sub>3</sub> (10.8 mg, 0.0783 mmol, 1.2 eq.) and benzyl bromide (8.2 µl, 0.0686 mmol, 1.05 eq.) in DMF (4.0 ml) was stirred for 24 hours at 60 °C. The reaction mixture was poured into the mixed solvent of chloroform and water. The organic layer was separated and washed successively with 0.1 N hydrochloric acid solution, water (twice) and brine. After dried over sodium sulfate, the solvent was evaporated in vacuo to give a residue. The residue was

purified by GPC to afford (*R*)-**8** (16 mg, 0.0228 mmol, 35%), (*R*)-**4** (15 mg, 0.0189 mmol, 29%), unreacted (*R*)-**5** (10 mg, 0.0163 mmol, 25%). Red amorphous; IR (KBr) 3447, 3065, 1283, 1250, 748  $\text{cm}^{-1}$ ;  $^1\text{H}$  NMR (400 MHz,  $\text{CDCl}_3$ )  $\delta$  1.2-2.1 (m, 4H), 3.0-4.6 (m, 8H), 5.19, 5.30 (AB q,  $\nu_{\text{AB}} = 17.2$  Hz,  $J_{\text{AB}} = 11.2$  Hz; s, 2H), 6.5-7.8 (m, 23H);  $^{13}\text{C}$  NMR (150 MHz,  $\text{CDCl}_3$ )  $\delta$  28.9, 29.2, 29.9, 30.1, 65.3, 66.0, 67.1, 68.7, 68.7, 69.1, 69.6, 70.4, 70.7, 71.8, 108.9, 109.3, 110.5, 111.7, 113.6, 114.0, 114.4, 116.6, 118.8, 119.1, 119.3, 120.6, 121.2, 121.5, 121.7, 122.2, 123.4, 123.7, 124.0, 124.4, 124.7, 124.8, 125.1, 125.2, 125.4, 125.8, 125.8, 125.9, 126.1, 126.2, 126.4, 126.5, 126.6, 126.6, 126.9, 127.5, 127.6, 128.0, 128.1, 128.2, 128.4, 128.5, 128.7, 128.8, 129.0, 129.0, 129.6, 130.4, 130.8, 131.0, 131.1, 131.2, 131.5, 131.6, 136.6, 136.7, 142.4, 144.4, 144.5, 144.6, 144.9, 146.3, 146.4, 146.6, 148.3, 151.5, 151.6, 152.8, 153.6 (Some peaks overlapped); HRMS ( $\text{FAB}^+$ ) Calcd for  $\text{C}_{45}\text{H}_{38}\text{N}_2\text{O}_6$  ( $\text{M}$ ) $^+$ : 702.2730. Found: 702.2729; LR MS ( $\text{FAB}^+$ ) 702.3 ( $\text{M}$ ) $^+$ .

#### 4. Determination of configuration of (R)-4.

As a precautionary measure, **4** was derivatized to known compound **11**<sup>SS</sup> to certify that inversion did not occur during the synthesis of **4** from (R)-**2**. Below is a scheme that outlined the derivatization of **4** synthesized from (R)-**2** to **11**. The specific optical rotation of derivatized **11** was +49°, whereas that of known compound (S)-**11** was -52°. Thus, the absolute configuration of **4** synthesized from (R)-**2** was (R) without inversion or racemization.

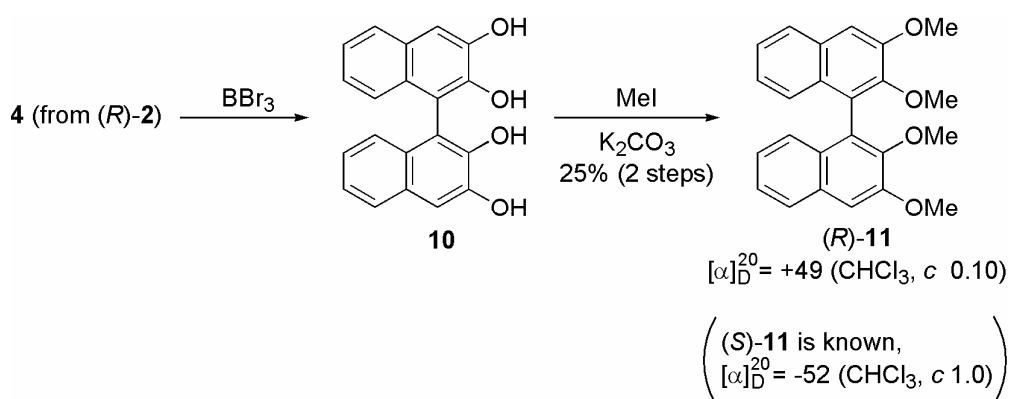

#### Tetramethoxybinaphthyl (R)-11.

A suspension of (R)-**4** (100 mg, 0.126 mmol) in CH<sub>2</sub>Cl<sub>2</sub> (4.5 ml) containing BBr<sub>3</sub> (1.51 mmol, 12 eq.) was stirred for 24 hours at 0 °C. The reaction mixture was poured into the mixed solvent of chloroform and water. The organic layer was separated and washed successively with 0.1 N hydrochloric acid solution, water (twice) and brine. After dried over sodium sulfate, the solvent was evaporated in vacuo to afford crude (R)-**10**. Next, a suspension of crude (R)-**10** (ca. 40 mg), K<sub>2</sub>CO<sub>3</sub> (139 mg, 1.01 mmol, 8.0 eq.) and MeI (93 μl, 1.51 mmol, 12 eq.) in DMF (2.0 ml) was stirred for 24 hours at room temperature. The reaction mixture was poured into the mixed solvent of ethyl acetate and water. The organic layer was separated and washed successively with 0.1 N hydrochloric acid solution, water (twice) and brine. After dried over sodium sulfate, the solvent was evaporated in vacuo to give a residue. The residue was purified by preparative TLC (SiO<sub>2</sub>; *n*-hexane/chloroform/ethyl acetate = 9/3/1) and GPC and preparative TLC (SiO<sub>2</sub>; *n*-hexane/chloroform/ethyl acetate = 8/3/1) to afford (R)-**11** (12 mg, 0.0321 mmol, 25% over 2 steps). Colorless powder;  $[\alpha]_{\text{D}}^{20} = +49$  (*c* 0.6, CHCl<sub>3</sub>); IR (KBr) 2940, 1464, 1420, 1254, 1117 cm<sup>-1</sup>; <sup>1</sup>H NMR (300 MHz, CDCl<sub>3</sub>) δ 3.61 (s, 6H), 4.06 (s, 6H), 7.0-7.2 (m, 4H), 7.3-7.5 (m, 4H), 7.78 (d, *J* = 8.1 Hz, 2H); <sup>13</sup>C NMR (75 MHz, CDCl<sub>3</sub>) δ 55.6, 60.7, 107.2, 124.0, 125.2, 125.7, 125.9, 126.5, 128.9, 131.2, 147.3, 152.3; HR MS (ESI<sup>+</sup>) Calcd for C<sub>24</sub>H<sub>22</sub>O<sub>4</sub>Na (M+Na)<sup>+</sup>: 397.1416. Found: 397.1411; LR MS (FAB<sup>+</sup>) 374.2 (M)<sup>+</sup>.

C:\Documents and Settings\Administrator\My Documents\ValueY\_DEFAULT.ALS  
Kaz20-1day

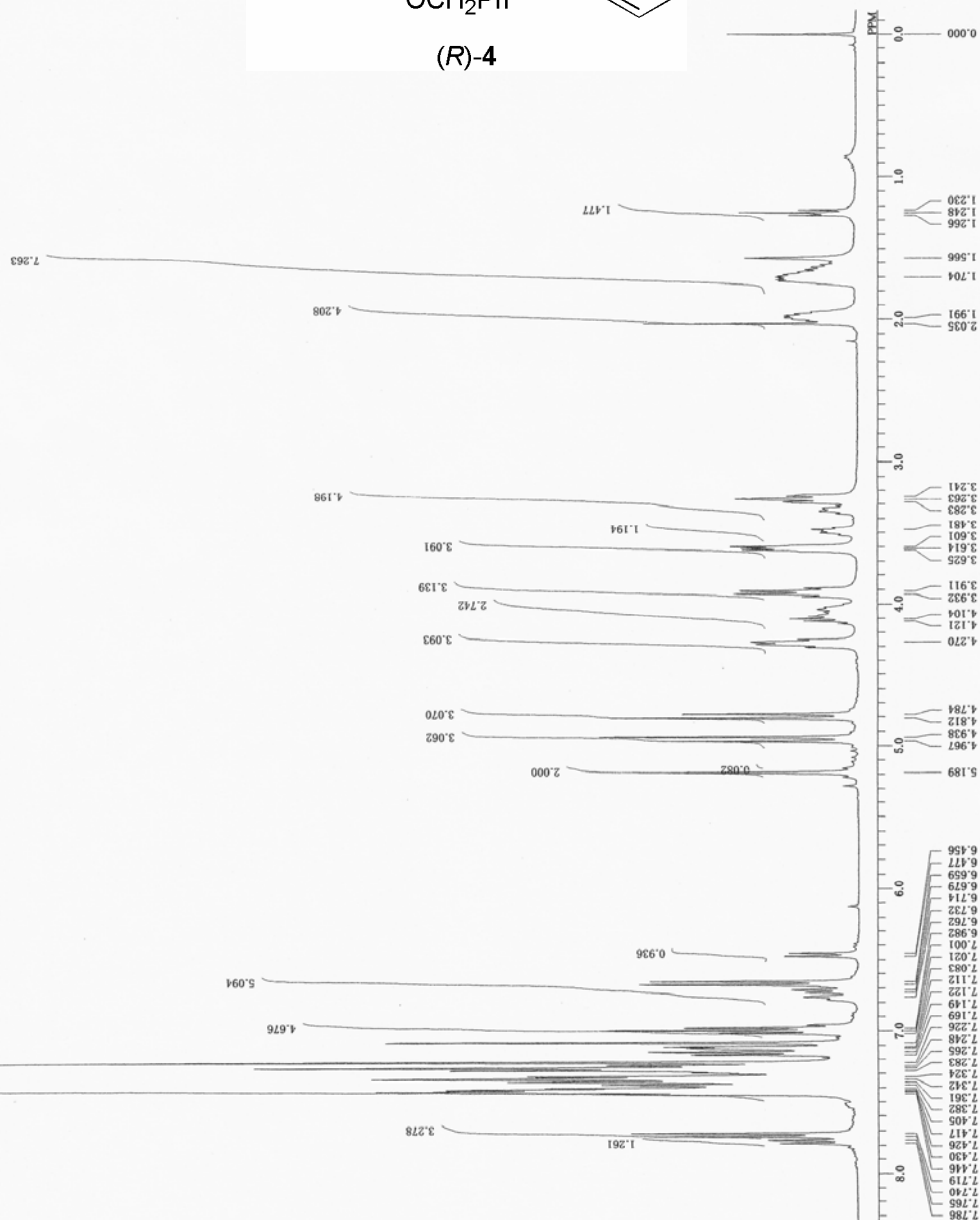

C:\Documents and Settings\Administrator\My Documents\alice\ DEFAULT.ALS  
Bn

\_DEFAULT.ALS  
 Bn  
 COMINT  
 DATIM Wed May 27 09:39:33  
 OBNUC 13C  
 EXMOD BCM  
 OBFRQ 75.45 MHz  
 OBSET 124.00 KHz  
 OBFIN 1840.00 Hz  
 POINT 32768  
 FREQU 20356.23 Hz  
 SCANS 13098  
 ACQTM 1.6097 sec  
 PD 1.3900 sec  
 FW1 4.20 usec  
 1H  
 IRNUC 20.6 c  
 CTEMP CDCL3  
 SLVNT 77.00 ppm  
 EXREF 2.00 Hz  
 BF 23  
 RGAIN

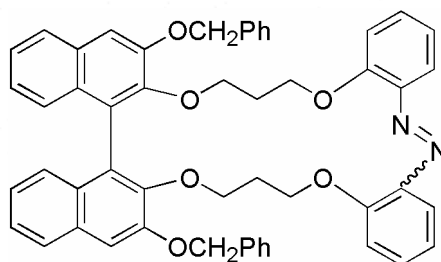

(R)-4

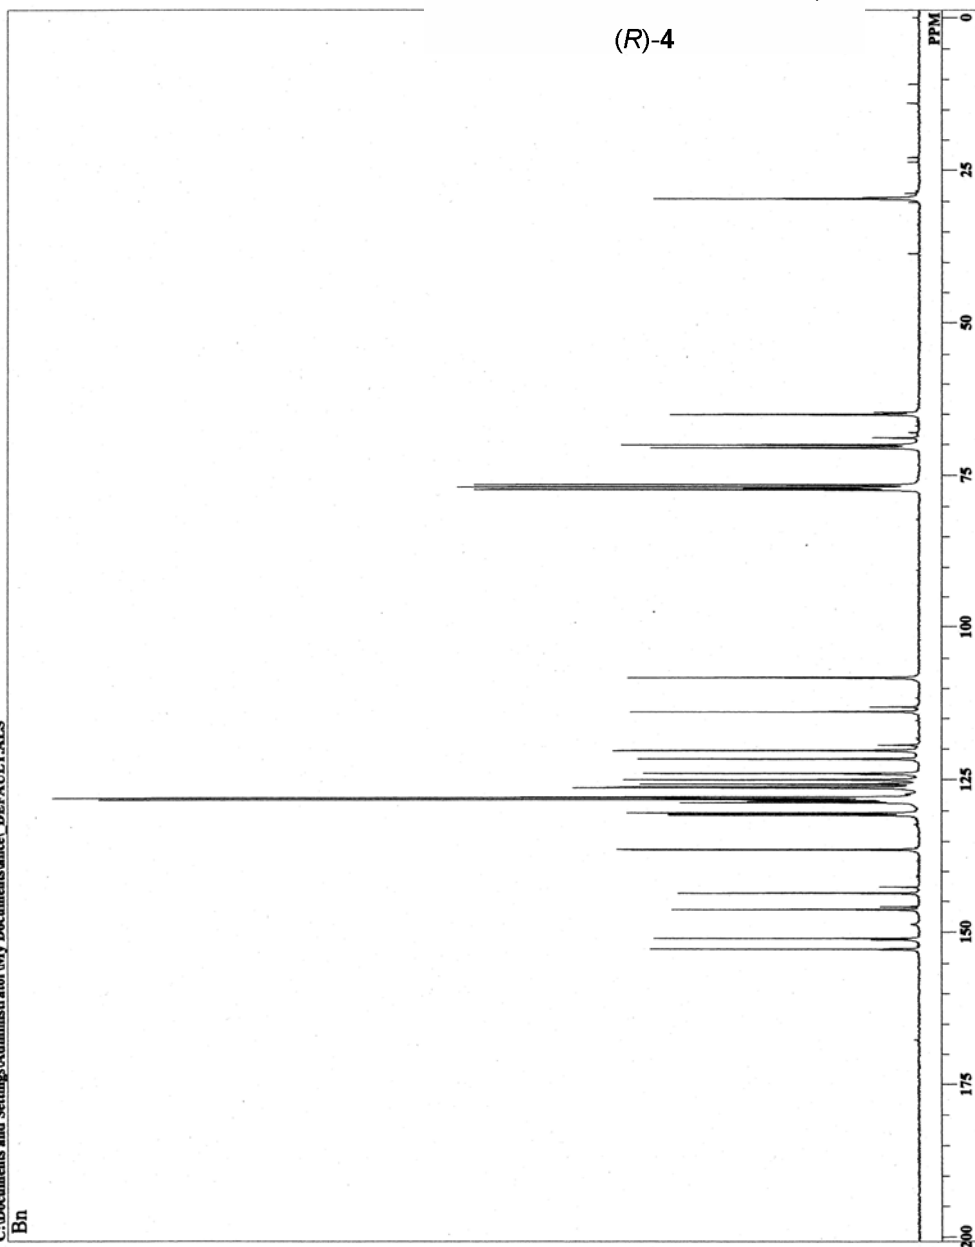

Kaz16-2

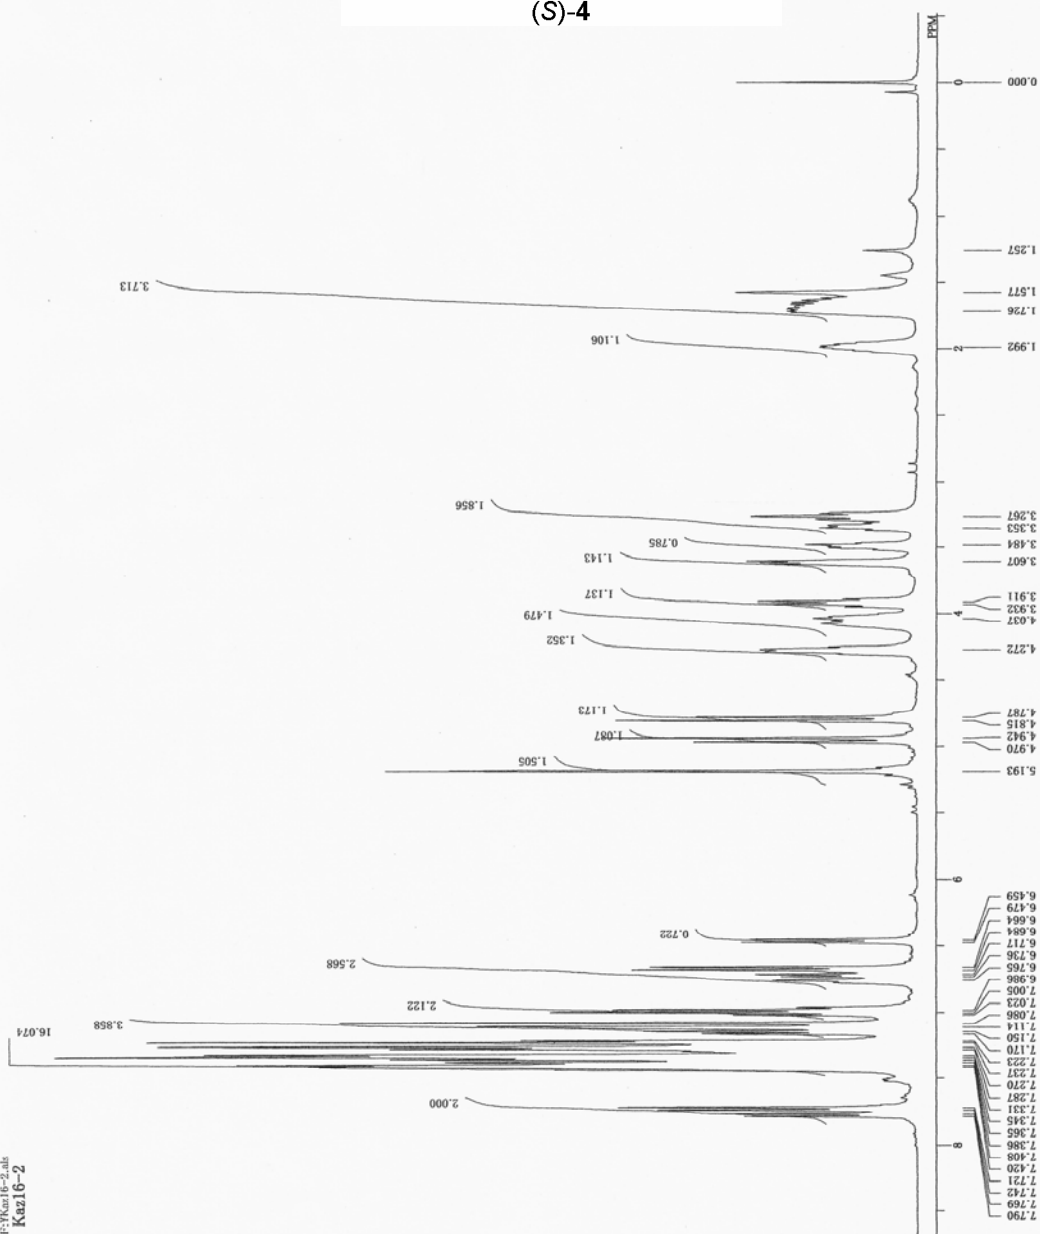



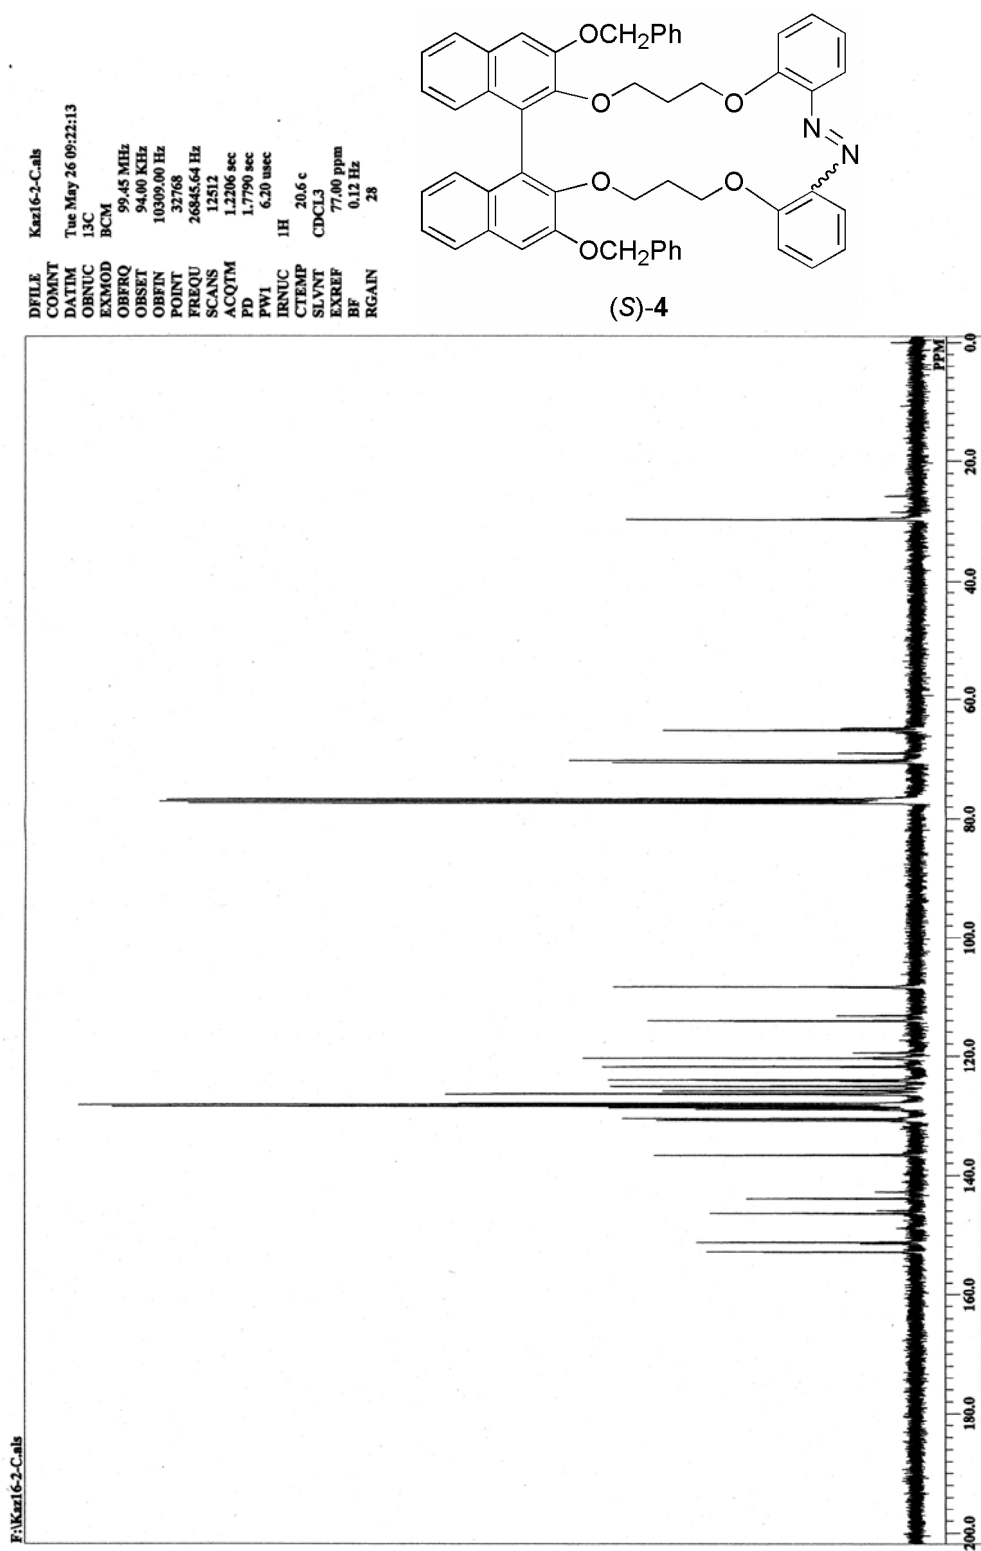

DFILE Kar76-1.xls  
 COMINT Kar76-1  
 DATIM Wed Nov 12 17:43:32 2008  
 EXMOD 1H  
 EXMOD NON  
 OBFREQ 385.75 MHz  
 OBSST 1271.00 Hz  
 OBSST 1022.00 Hz  
 POINT 16384  
 FREQU 7912.96 Hz  
 SCANS 2  
 ACQTIM 2.0705 sec  
 PD 4.9250 sec  
 FWH 6.30 usec  
 SFO 22.6 c  
 INVC CTBMP  
 SLANT CDCL3  
 EXREF 0.00 ppm  
 FID 0.12 Hz  
 RGAIN 17

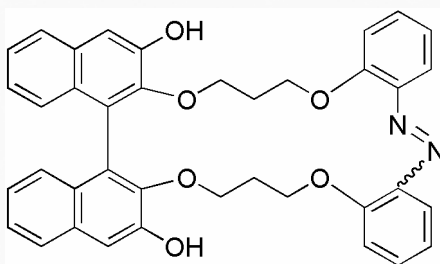

(R)-5

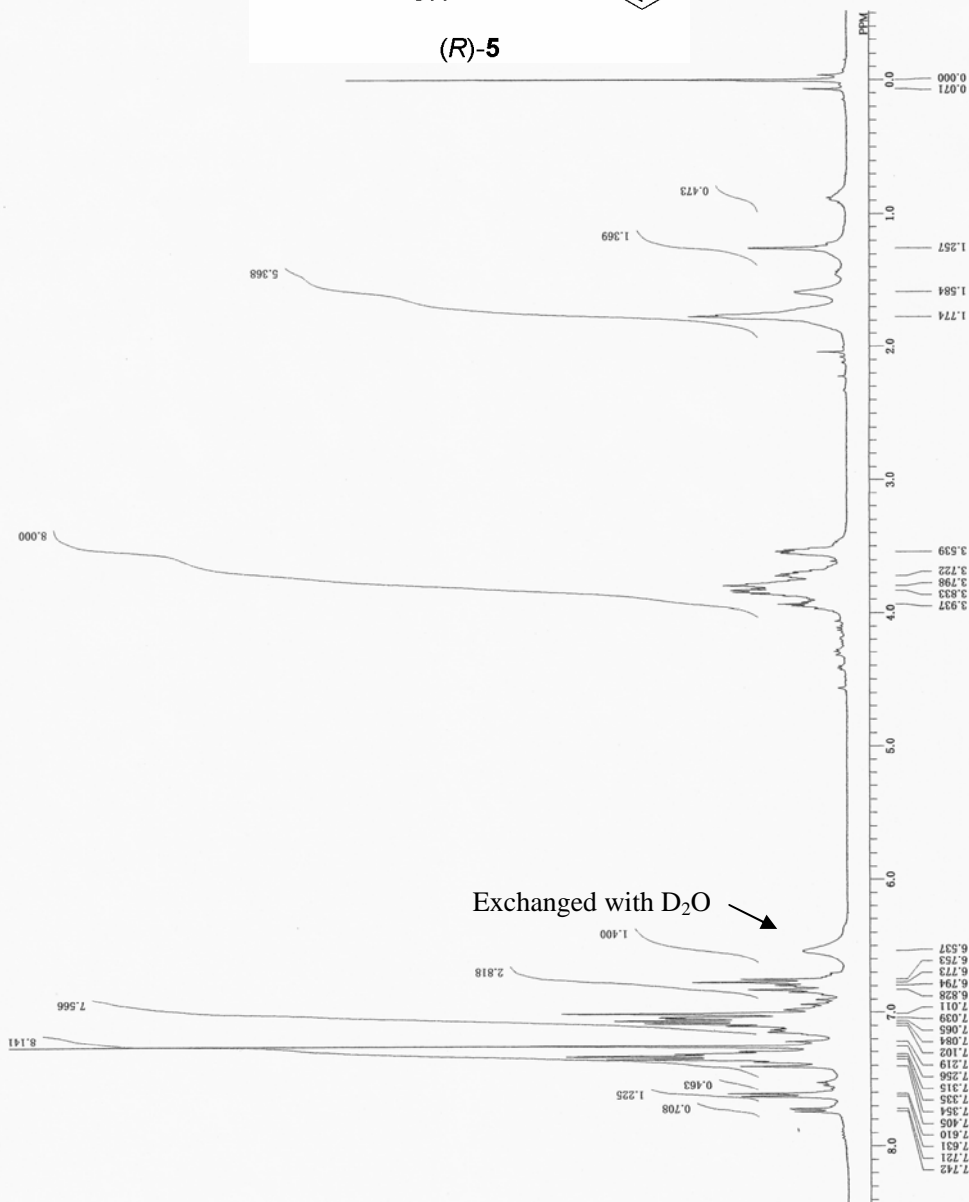

\_DEFAULT.ALS  
 COMNT  
 DATIM Mon May 25 09:45:2  
 OBNUC 13C  
 EXMOD BCM  
 OBFRQ 75.45 MHz  
 OBSET 124.00 KHz  
 OBFIN 1840.00 Hz  
 POINT 32768  
 FREQU 20356.23 Hz  
 SCANS 15694  
 ACQTM 1.6097 sec  
 PD 1.3900 sec  
 FWI 4.20 usec  
 IRNUC 1H  
 CTEMP 21.9 c  
 SLVNT CDCL3  
 EXREF 77.00 ppm  
 RF 0.12 Hz  
 RGAIN 23

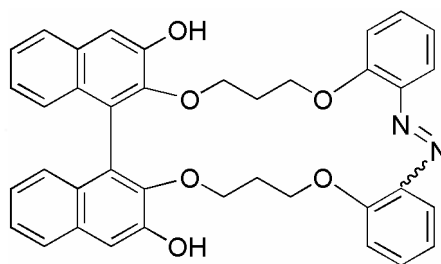

(R)-5

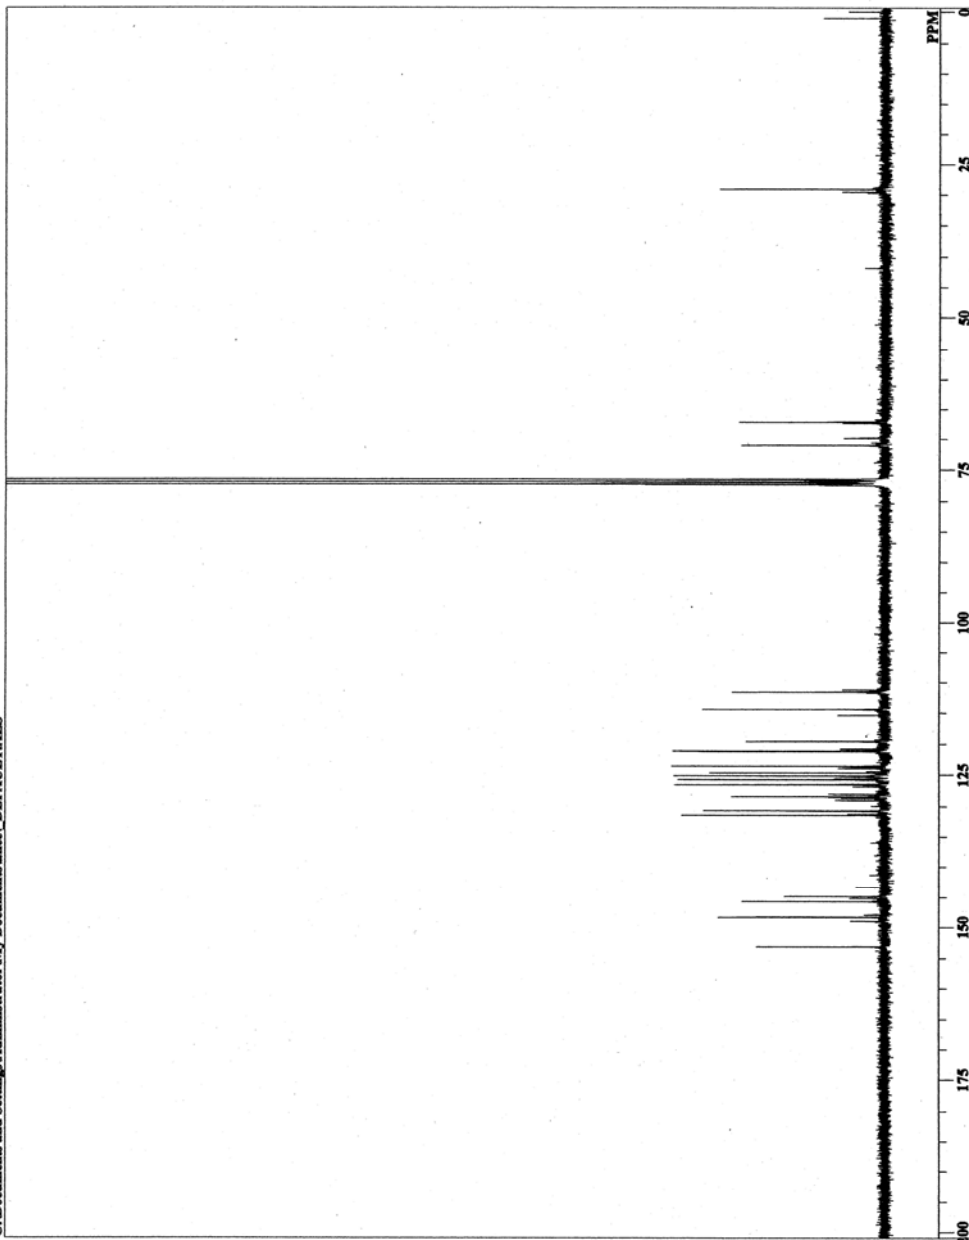



|        |             |
|--------|-------------|
| DEFILE | 99.45 MHz   |
| COMANT | 94.00 MHz   |
| DATIM  | 109.50 Hz   |
| ORBIT  | 109.50 Hz   |
| ORNUC  | 28845.64 Hz |
| EXMOD  | 13444       |
| OBRRQ  | 1.2206 sec  |
| ORSET  | 1.7790 sec  |
| ORNSN  | 6.20 usec   |
| POINT  | 1H 19.9 c   |
| FREQU  | CDCL3       |
| SCANS  | 77.00 ppm   |
| ACQTM  | 0.12 Hz     |
| PD     | 28          |
| IRNUC  |             |
| IRPMT  |             |
| SVANT  |             |
| EXREF  |             |
| BF     |             |
| RGAIN  |             |

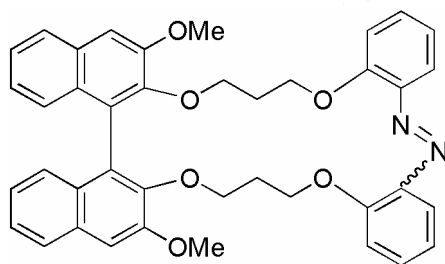

**(R)-6**

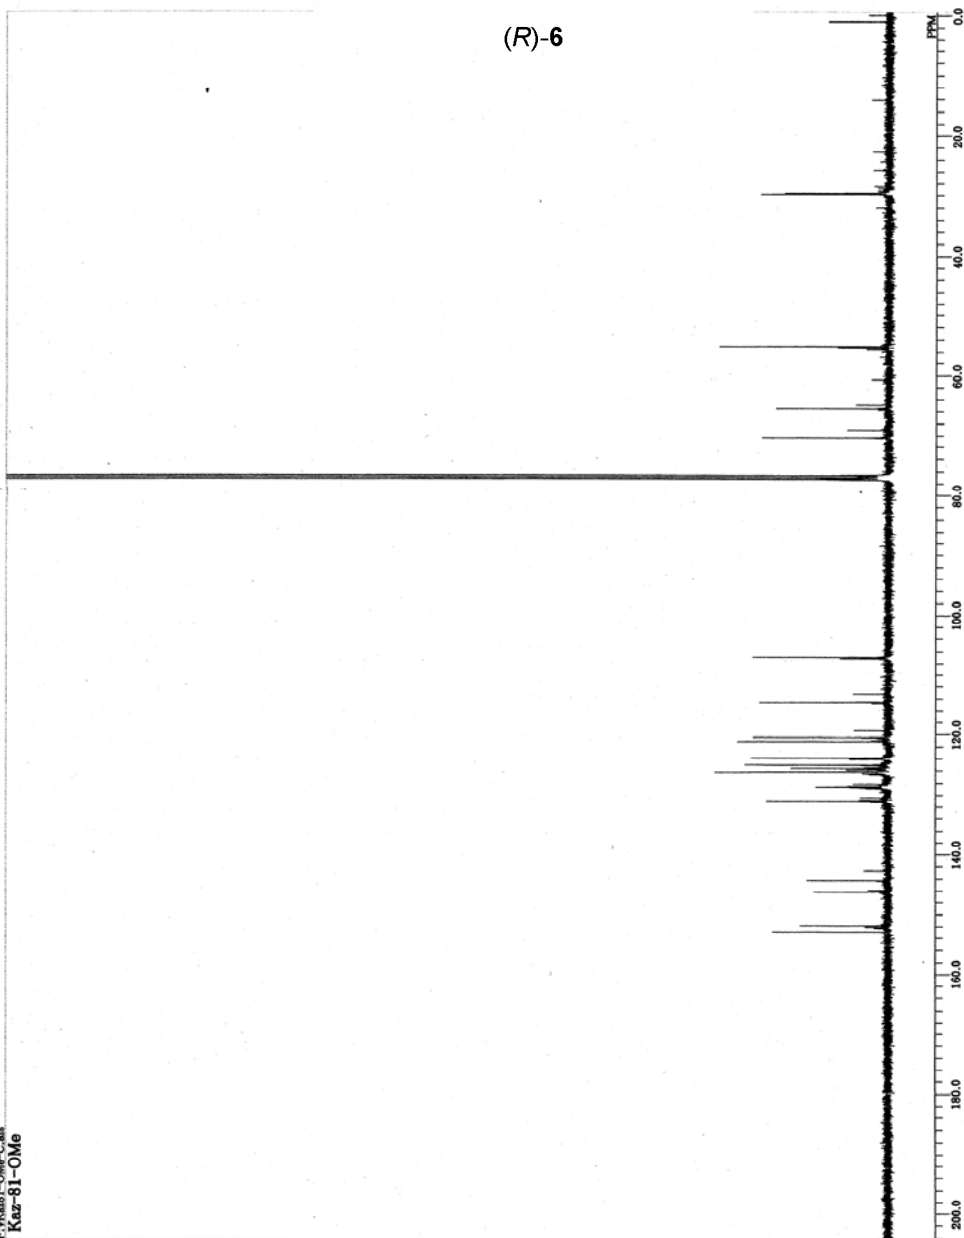

D:\Kaz95\Kaz95\_als  
 F:\Kaz95\Kaz95\_als  
 Date: Dec 25 11:24:12 2008  
 DATUM 1H  
 EXMOD 1H  
 OBSFREQ 500.13575 MHz  
 OBSFREQ 127.000 MHz  
 OBSFREQ 10277.00 Hz  
 POINT 16384  
 PULPROG zgpg30  
 SCANS 32  
 ACQTM 2.0705 sec  
 PD 4.9250 sec  
 DELTA 6.30 usec  
 INJ 1H 22.7 °C  
 CTMP CDCL3  
 SLVNT CDCL3  
 REF 0.00 ppm  
 BR 0.12 Hz  
 RGAIN 13

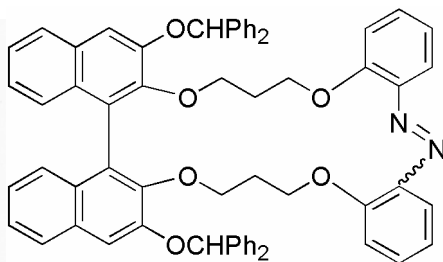

(R)-7

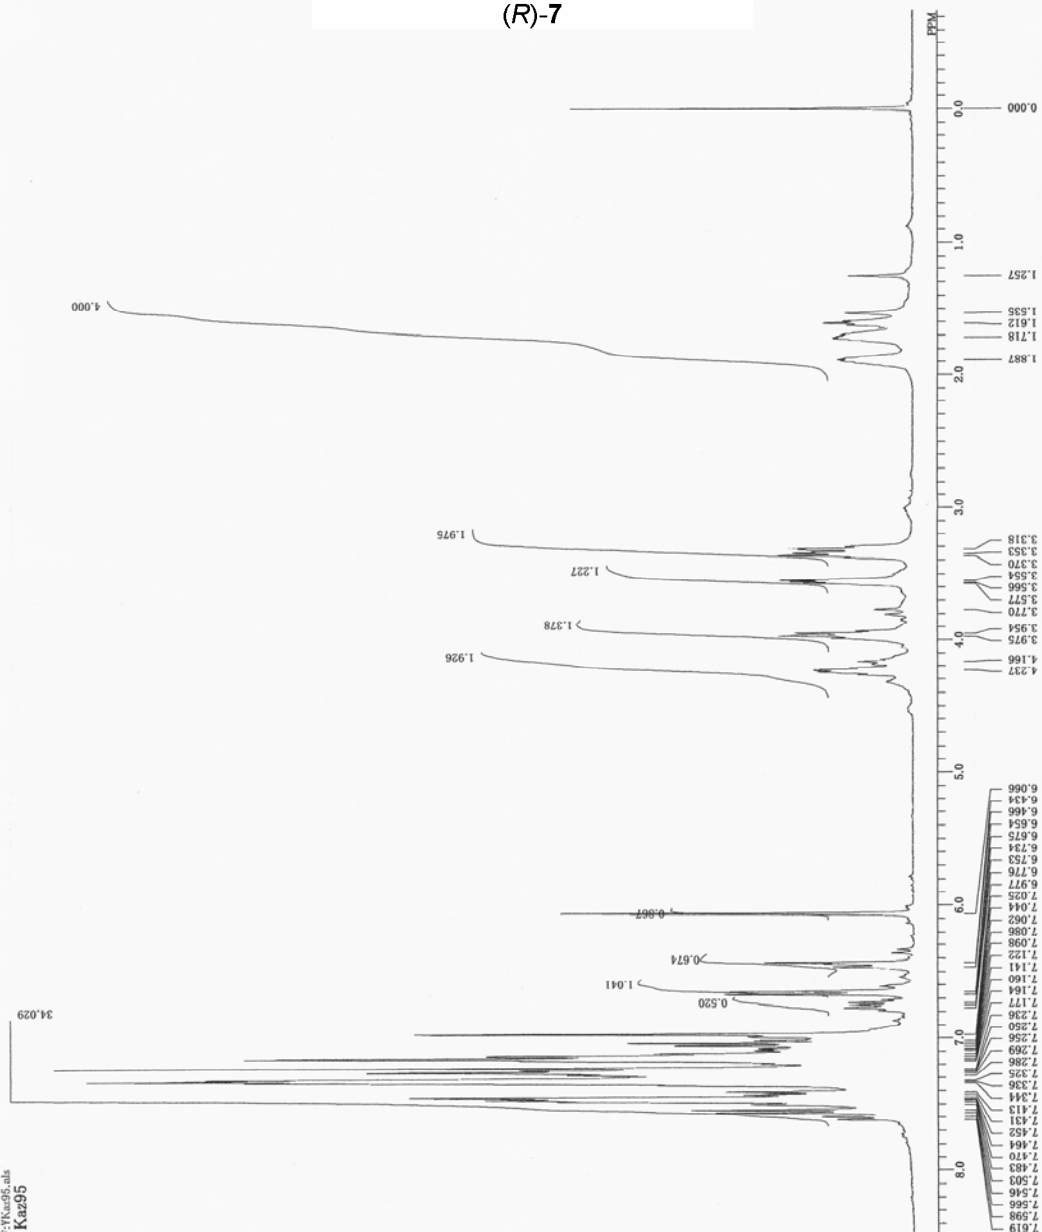

F:\Kaz95-Cals  
Kaz95

DFILE Kaz95-Cals  
COMNT Kaz95  
DATIM Sat May 23 10:00:59  
ORNUC 13C  
EXMOD BCM  
OBFRQ 99.45 MHz  
OBSET 94.00 KHz  
OBFIN 10309.00 Hz  
POINT 32768  
FREQU 26845.64 Hz  
SCANS 13442  
AQTM 1.2206 sec  
PD 1.7790 sec  
FW1 6.20 usec  
IRNUC 1H  
CTEMP 20.3 c  
SLVNT CDCl3  
EXREF 77.00 ppm  
BF 0.12 Hz  
RGAIN 28

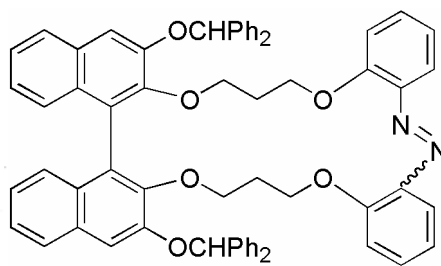

(R)-7

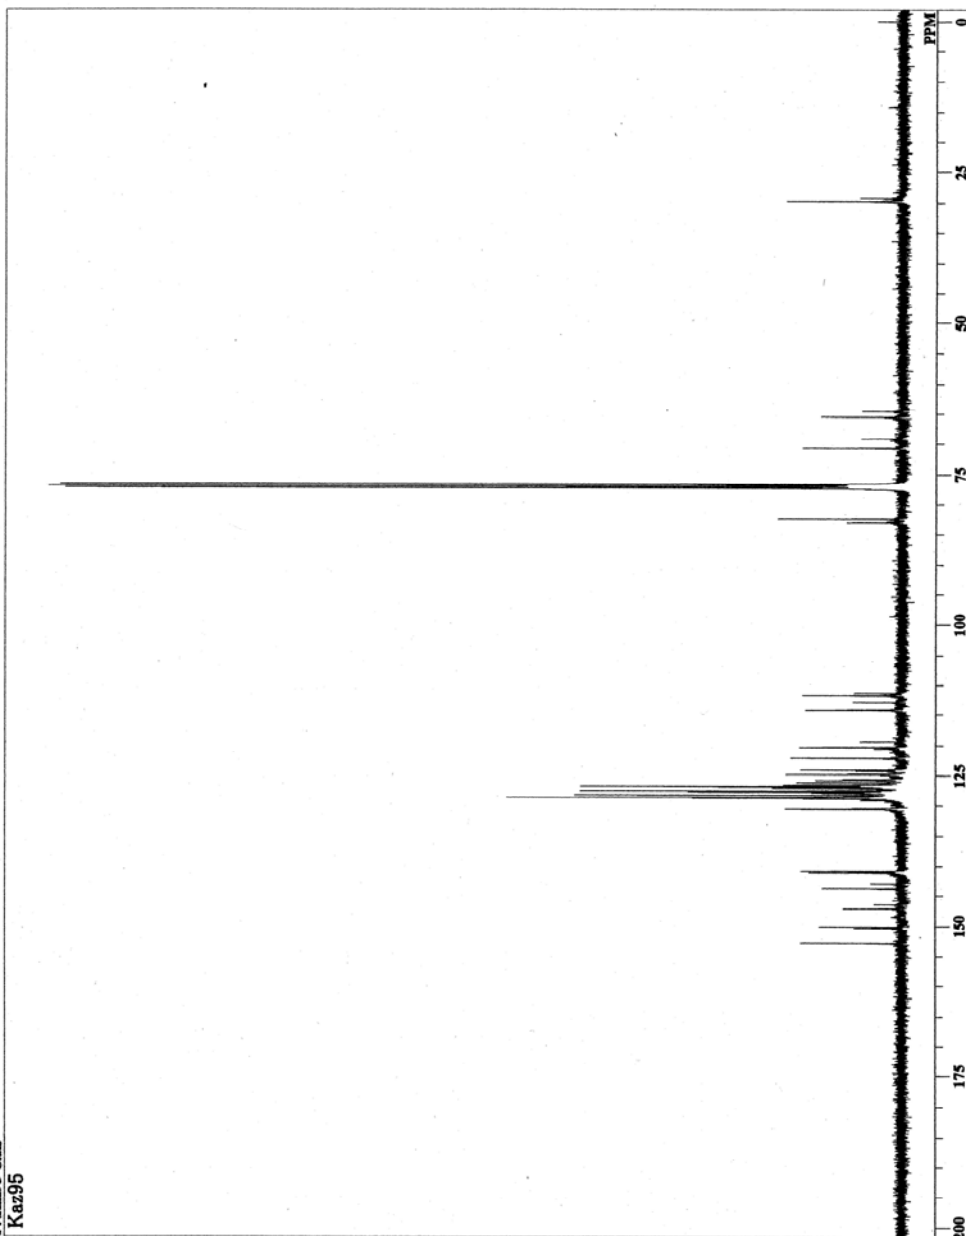







DFILE Kar70-5.als  
 CONNT Kar70-5  
 DATIM Mon Nov 10 13:56:22 2008  
 EXMOD 1H  
 OBNUC NON  
 OBSFQ 300.40 MHz  
 OBSST 130.00 KHz  
 OBFIN 1150.00 Hz  
 POINT 16384  
 FREQU 6006.01 Hz  
 SCANS 16  
 ACQTM 2.7279 sec  
 PD 4.2720 sec  
 PW1 5.50 usec  
 IRNUC 1H  
 CTMP 23.2 c  
 SVPRT CDCL3  
 EXREF 0.00 ppm  
 BF 0.24 Hz  
 RGAIN 15

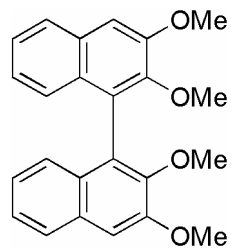

(R)-11

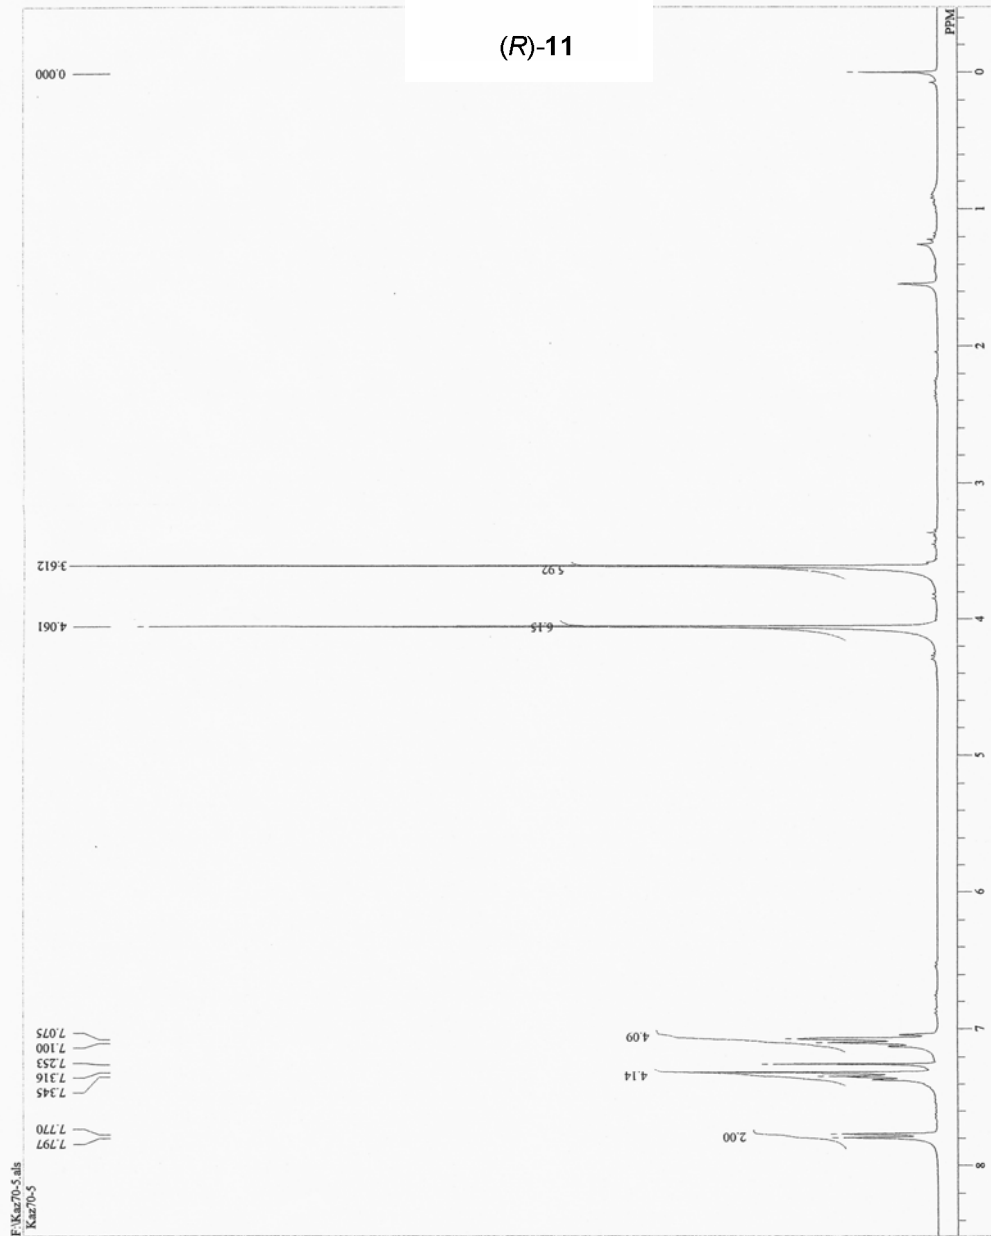

F:\Kar70-5.Calls  
 Kar70-5  
 DFILE Kar70-5.Calls  
 CONNT Kar70-5  
 DATIM Mon Nov 10 14:47:21 2008  
 OBNUC 13C  
 EXMOD BCM  
 OBFRQ 75.45 MHz  
 OBSET 124.00 KHz  
 OBFEN 1840.00 Hz  
 POINT 32768  
 FREQU 20356.23 Hz  
 SCANS 1000  
 ACQTM 1.6097 sec  
 PD 1.3900 sec  
 PW1 4.20 usec  
 IRNUC 1H  
 CHIRP 22.3 c  
 SNUC CDCL<sub>3</sub>  
 SNUF 77.00 ppm  
 EXREF 0.24 Hz  
 BF 24  
 RGAIN 24

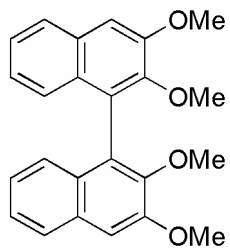

(R)-11

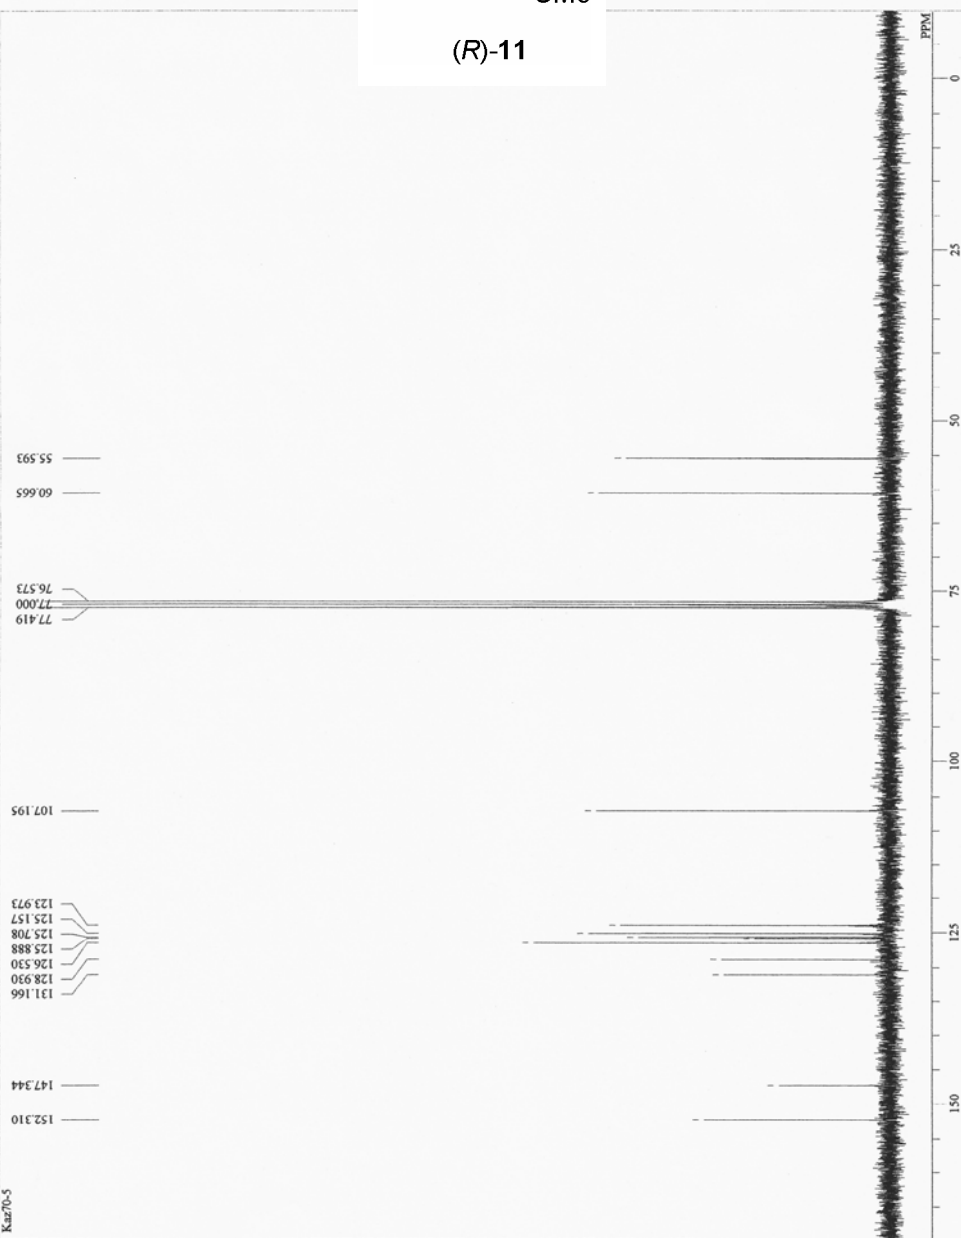

### **References**

- (S1) Tsubaki, K.; Tanaka, H.; Furuta, T.; Tanaka, K.; Kinoshita, T.; Fuji, K. *Tetrahedron*, **2002**, 58, 5611.
- (S2) Eyring, H. *Chem. Rev.* **1935**, 17, 65.
- (S3) Tsubaki, K.; Morikawa, H.; Tanaka, H.; Fuji, K. *Tetrahedron: Asymmetry* **2003**, 14, 1393-1396.
- (S4) Kawamoto, M.; Aoki, T.; Wada, T. *Chem. Commun.* **2007**, 930.
- (S5) Furuta, T.; Tanaka, K.; Tsubaki, K.; Fuji, K. *Tetrahedron* **2004**, 60, 4431.
